# Supplementary material for: A novel role for apatinib in enhancing radiosensitivity in non-small cell lung cancer cells by suppressing the AKT and ERK pathways
Source: PeerJ journal article supplement (doi:10.7717/peerj.12356), 2021-10-28
Supplement: Raw-colony_formation_assay.7z [file Raw-colony_formation_assay.7z]

## Sheet: 1
LK2+DMSO
dose	Number of planted cells	Number of colonies formed	Rates	SF	SF
0Gy	300	296	0.986667	1	1
2Gy	300	178	0.593333	0.601351	0.601351
4Gy	300	125	0.416667	0.422297	0.422297
6Gy	300	55	0.183333	0.185811	0.185811
8Gy	300	32	0.106667	0.108108	0.108108
LK2+Apa
dose	Number of planted cells	Number of colonies formed	Rates	SF	SF
0Gy	300	219	0.73	1	1
2Gy	300	118	0.393333	0.538813	0.538813
4Gy	300	40	0.133333	0.182648	0.182648
6Gy	300	12	0.04	0.0547945	0.0547945
8Gy	300	4	0.0133333	0.0182648	0.0182648

## Sheet: 2
LK2+DMSO
dose	Number of planted cells	Number of colonies formed	Rates	SF	SF
0Gy	300	266	0.886667	1	1
2Gy	300	161	0.536667	0.605263	0.605263
4Gy	300	83	0.276667	0.31203	0.31203
6Gy	300	46	0.153333	0.172932	0.172932
8Gy	300	28	0.0933333	0.105263	0.105263
LK2+Apa
dose	Number of planted cells	Number of colonies formed	Rates	SF	SF
0Gy	300	211	0.703333	1	1
2Gy	300	114	0.38	0.540284	0.540284
4Gy	300	38	0.126667	0.180095	0.180095
6Gy	300	12	0.04	0.056872	0.056872
8Gy	300	3	0.01	0.014218	0.014218

## Sheet: 3
LK2+DMSO
dose	Number of planted cells	Number of colonies formed	Rates	SF	SF
0Gy	300	287	0.956667	1	1
2Gy	300	166	0.553333	0.578397	0.578397
4Gy	300	109	0.363333	0.379791	0.379791
6Gy	300	49	0.163333	0.170732	0.170732
8Gy	300	35	0.116667	0.121951	0.121951
LK2+Apa
dose	Number of planted cells	Number of colonies formed	Rates	SF	SF
0Gy	300	165	0.55	1	1
2Gy	300	103	0.343333	0.624242	0.624242
4Gy	300	36	0.12	0.218182	0.218182
6Gy	300	10	0.0333333	0.0606061	0.0606061
8Gy	300	3	0.01	0.0181818	0.0181818
