# Supplementary material for: A novel role for apatinib in enhancing radiosensitivity in non-small cell lung cancer cells by suppressing the AKT and ERK pathways
Source: PeerJ journal article supplement (doi:10.7717/peerj.12356), 2021-10-28
Supplement: Raw-The_cytotoxicity_and_IC50_of_AP.7z [file Raw-The_cytotoxicity_and_IC50_of_AP.7z]

## Sheet: A549
	0μmol/L					5μmol/L					10μmol/L					20μmol/L					40μmol/L					80μmol/L
Time	1	2	3	4	5	1	2	3	4	5	1	2	3	4	5	1	2	3	4	5	1	2	3	4	5	1	2	3	4	5
24H	0.575	0.584	0.58	0.562	0.572	0.548	0.539	0.536	0.529	0.554	0.511	0.521	0.501	0.514	0.514	0.492	0.493	0.485	0.499	0.505	0.476	0.447	0.455	0.459	0.465	0.404	0.413	0.415	0.424	0.463
48H	1.277	1.477	1.441	1.427	1.362	1.298	1.172	1.213	1.21	1.153	1.021	1.102	0.991	0.991	1.048	0.794	0.78	0.789	0.754	0.771	0.541	0.529	0.511	0.509	0.529	0.515	0.511	0.481	0.495	0.52
72H	2.615	2.647	2.634	2.656	2.764	2.327	2.29	2.385	2.379	2.228	2.017	1.897	2.011	1.868	1.93	1.125	1.131	1.05	1.168	1.083	0.549	0.543	0.506	0.523	0.511	0.484	0.474	0.481	0.451	0.435
