# Supplementary material for: A novel role for apatinib in enhancing radiosensitivity in non-small cell lung cancer cells by suppressing the AKT and ERK pathways
Source: PeerJ journal article supplement (doi:10.7717/peerj.12356), 2021-10-28
Supplement: Raw-The_inhibitory_effect_of_IR_was_enhanced_by_AP.7z [file Raw-The_inhibitory_effect_of_IR_was_enhanced_by_AP.7z]

## Sheet: LK2
	LK2+DMSO			LK2+Apa			LK2+DMSO+Radiation			LK2+Apa+Radiation
Time	1	2	3	1	2	3	1	2	3	1	2	3
24H	0.74	0.704	0.723	0.623	0.588	0.582	0.616	0.618	0.632	0.572	0.579	0.58
48H	0.962	0.946	0.953	0.821	0.829	0.834	0.768	0.762	0.769	0.722	0.704	0.712
72H	1.478	1.452	1.445	1.054	1.056	1.065	0.867	0.895	0.886	0.689	0.702	0.71
96H	1.687	1.634	1.718	1.186	1.209	1.18	0.929	0.941	0.949	0.794	0.748	0.756
